# Supplementary material for: Dembo polymerase chain reaction technique for detection of bovine abortion, diarrhea, and respiratory disease complex infectious agents in potential vectors and reservoirs
Source: PubMed Central journal article supplement — J Vet Sci. 2018 May 28;19(3):350–7. doi: 10.4142/jvs.2018.19.3.350 (PMC5974516; doi:10.4142/jvs.2018.19.3.350), 2018-05-28
Supplement: jvs-19-350-s001.pdf [file jvs-19-350-s001.pdf]

**Supplementary Table 1.** GenBank accession numbers for the reference sequences used for primer and probe design

| Pathogen name            | GenBank accession No.                                                                                                                                                                     |
|--------------------------|-------------------------------------------------------------------------------------------------------------------------------------------------------------------------------------------|
| Aino virus               | HE795088, AB542973, AB542972, AB542971, AB542970, AB542969, AB542978, AB542967, AB542966, AB100695                                                                                        |
| Chuzan virus             | NC005988, AB014727, AY078469, AY078470                                                                                                                                                    |
| Ibaraki virus            | AB107801, AB106908, AB106907, AB106903, AB106902, AB106901, AB106900                                                                                                                      |
| Simbu group*             | KC108864, NC018464, NC018462, HE795092                                                                                                                                                    |
| <i>Toxoplasma gondii</i> | S63900, DQ872518, GQ253080, GQ253086, DQ872517, AK317969, GQ253075, GQ253073, X14080, AY187278, JX045363, JX045390, JX045394, HM776940, JX045356, XM002368164, S73634, AY217784, AY661791 |
| <i>Neospora caninum</i>  | KX683874, KX683873, KU253799, KR106184, KR106181, KP715562, KP715561, KP715560, KP715559, KF649845, KF649845, KF649846, KF649847, HM031965                                                |

\*Simbu group: Douglas virus, Sathuperi virus, Shamonda virus, Schmallerberg virus.
