# Supplementary material for: Dembo polymerase chain reaction technique for detection of bovine abortion, diarrhea, and respiratory disease complex infectious agents in potential vectors and reservoirs
Source: PubMed Central journal article supplement — J Vet Sci. 2018 May 28;19(3):350–7. doi: 10.4142/jvs.2018.19.3.350 (PMC5974516; doi:10.4142/jvs.2018.19.3.350), 2018-05-28
Supplement: jvs-19-350-s002.pdf [file jvs-19-350-s002.pdf]

**Supplementary Table 2.** Summary of information about the samples included in this study

| Farm identifier | Type of farm | Inside/outside of farm | Type of sample               | No. of samples |
|-----------------|--------------|------------------------|------------------------------|----------------|
| A               | Dairy        | Outside                | Gadfly                       | 6              |
|                 |              | Inside                 | Spider                       | 1              |
|                 |              | Inside                 | Mosquito                     | 3              |
|                 |              | Inside                 | Fly                          | 14             |
|                 |              | Outside                | Feces of Bird                | 7              |
|                 |              | Inside                 | Intestine contents of rodent | 1              |
| B               | Dairy        | Inside                 | Fly                          | 14             |
|                 |              | Inside                 | Cockroach                    | 1              |
|                 |              | Outside                | Gadfly                       | 2              |
|                 |              | Inside                 | Gadfly                       | 2              |
|                 |              | Inside                 | Feces of Bird                | 5              |
|                 |              | Outside                | Feces of Bird                | 2              |
| C               | Dairy        | Inside                 | Intestine contents of rodent | 1              |
|                 |              | Inside                 | Fly                          | 2              |
| D               | Dairy        | Inside                 | Fly                          | 1              |
| E               | Meat         | Inside                 | Fly                          | 2              |
|                 |              | Inside                 | Spider                       | 1              |
|                 |              | Inside                 | Unidentified insect          | 1              |
|                 |              | Outside                | Gadfly                       | 2              |
|                 |              | Outside                | Feces of rodent              | 2              |
|                 |              | Inside                 | Feces of rodent              | 2              |
| F               | Meat         | Inside                 | Fly                          | 2              |
|                 |              | Outside                | Gadfly                       | 2              |
|                 |              | Outside                | Fly                          | 2              |
| G               | Meat         | Inside                 | Fly                          | 1              |
|                 |              | Outside                | Fly                          | 1              |
|                 |              | Inside                 | Feces of rodent              | 1              |
|                 |              | No information         | Feces of rodent              | 1              |
| H               | Meat         | Inside                 | Fly                          | 1              |
|                 |              | Outside                | Fly                          | 1              |
|                 |              | Outside                | Gadfly                       | 3              |
| I               | Meat         | Inside                 | Fly                          | 1              |
|                 |              | Outside                | Fly                          | 1              |
| J               | Meat         | Inside                 | Fly                          | 2              |
|                 |              | Outside                | Fly                          | 1              |
| K               | Meat         | Inside                 | Fly                          | 1              |
|                 |              | Outside                | Fly                          | 1              |
| L               | Meat         | Inside                 | Fly                          | 1              |
| M               | Meat         | Inside                 | Fly                          | 2              |
|                 |              | Inside                 | Feces of rodent              | 1              |
|                 |              | Outside                | Feces of rodent              | 2              |
|                 |              | Inside                 | Gadfly                       | 1              |
| N               | Meat         | Inside                 | Fly                          | 1              |
| O               | Meat         | Inside                 | Fly                          | 1              |
| P               | Meat         | Inside                 | Fly                          | 1              |
|                 |              | Outside                | Fly                          | 1              |
| Q               | Meat         | Inside                 | Fly                          | 2              |
| R               | Meat         | Inside                 | Fly                          | 1              |
|                 |              | Outside                | Fly                          | 1              |
|                 |              | No information         | Feces of rodent              | 2              |
| S               | Meat         | Inside                 | Fly                          | 1              |
| T               | Meat         | Inside                 | Fly                          | 1              |
|                 |              | Outside                | Fly                          | 1              |
| U               | Meat         | Inside                 | Fly                          | 1              |
|                 |              | Outside                | Fly                          | 1              |
|                 |              | Inside                 | Feces of rodent              | 1              |
